# Symptoms Associated with Victimization in Patients with Schizophrenia and Related Disorders

Federico Fortugno<sup>1</sup>, Christina Katsakou<sup>2</sup>, Stephen Bremner<sup>3</sup>, Andrzej Kiejna<sup>4</sup>, Lars Kjellin<sup>5</sup>, Petr Nawka<sup>6</sup>, Jiri Raboch<sup>7</sup>, Thomas Kallert<sup>8</sup>, Stefan Priebe<sup>2\*</sup>

**1** Neurosciences, Mental Health and Sensory Functions Department, School of Medicine and Psychology, Sapienza University, Sant'Andrea Hospital, Rome, Italy, **2** Unit for Social and Community Psychiatry, Barts and the London School of Medicine and Dentistry, Queen Mary University of London, London, United Kingdom, **3** Centre for Primary Care and Public Health, Barts and the London School of Medicine and Dentistry, Queen Mary University of London, London, United Kingdom, **4** Department of Psychiatry, Wroclaw Medical University, Wroclaw, Poland, **5** Psychiatric Research Centre, School of Health and Medical Sciences, Örebro University, Örebro, Sweden, **6** Psychiatric Outpatient Klinik, Dresden, Germany, **7** Psychiatric Department, 1st Medical School, Charles University in Prague, Prague, Czech Republic, **8** Department of Psychiatry, Psychosomatic Medicine and Psychotherapy, Park Hospital Leipzig, and Soteria Hospital Leipzig, Leipzig, Germany

## Abstract

**Background:** Patients with psychoses have an increased risk of becoming victims of violence. Previous studies have suggested that higher symptom levels are associated with a raised risk of becoming a victim of physical violence. There has been, however, no evidence on the type of symptoms that are linked with an increased risk of recent victimization.

**Methods:** Data was taken from two studies on involuntarily admitted patients, one national study in England and an international one in six other European countries. In the week following admission, trained interviewers asked patients whether they had been victims of physical violence in the year prior to admission, and assessed symptoms on the Brief Psychiatric Rating Scale (BPRS). Only patients with a diagnosis of schizophrenia or related disorders (ICD-10 F20–29) were included in the analysis which was conducted separately for the two samples. Symptom levels assessed on the BPRS subscales were tested as predictors of victimization. Univariable and multivariable logistic regression models were fitted to estimate adjusted odds ratios.

**Results:** Data from 383 patients in the English sample and 543 patients in the European sample was analysed. Rates of victimization were 37.8% and 28.0% respectively. In multivariable models, the BPRS manic subscale was significantly associated with victimization in both samples.

**Conclusions:** Higher levels of manic symptoms indicate a raised risk of being a victim of violence in involuntary patients with schizophrenia and related disorders. This might be explained by higher activity levels, impaired judgement or poorer self-control in patients with manic symptoms. Such symptoms should be specifically considered in risk assessments.

**Citation:** Fortugno F, Katsakou C, Bremner S, Kiejna A, Kjellin L, et al. (2013) Symptoms Associated with Victimization in Patients with Schizophrenia and Related Disorders. PLoS ONE 8(3): e58142. doi:10.1371/journal.pone.0058142

**Editor:** James D. Clelland, The Nathan Kline Institute, United States of America

**Received:** September 19, 2012; **Accepted:** January 30, 2013; **Published:** March 19, 2013

**Copyright:** © 2013 Fortugno et al. This is an open-access article distributed under the terms of the Creative Commons Attribution License, which permits unrestricted use, distribution, and reproduction in any medium, provided the original author and source are credited.

**Funding:** The authors have no support or funding to report.

**Competing Interests:** The authors have declared that no competing interests exist.

\* E-mail: s.priebe@qmul.ac.uk

## Introduction

Patients with schizophrenia and related disorders have been found to be at higher risk of both being physically violent to others and becoming a victim of physical violence themselves [1–10]. In the public perception, the risk that patients may pose to others is more salient than the risk of patients getting harmed themselves. This predominant interest in patients as a potential source of violence is reflected in the scientific literature [11]. In a meta-analysis [1], Choe and colleagues found 30 empirical studies focusing on patients as perpetrators of a crime compared with only 10 studies on patients as victims.

Several studies have demonstrated an association between schizophrenia and a risk of violent behaviour. Based on a meta-analysis of 17 studies [6], Naudts and colleagues suggested that a history of antisocial behaviour and several neurobiological factors were associated with a higher risk of violent behaviour. Nielsen et

al (2012) meta-analysis found that a substantial proportion of patients examined after homicide (39%) and assault resulting in serious injury (38%) were in their first episode of psychosis [12]. With respect to psychopathological symptoms, Swanson et al. (2006) reported a higher risk in patients with lower levels of negative symptoms and higher levels of positive symptoms [13]. However, there is a shortage of studies on the symptoms associated with violent behaviour that were conducted in diagnostically homogeneous samples and which have used standardised assessment scales [14–17].

There is even less research on the symptoms associated with a risk of patients becoming the victims of violence. There have been suggestions that recent violent victimization is associated with higher levels of symptoms [1,5,7,18,19].

In particular, positive symptoms with paranoia, and manic symptoms with higher activity levels might be assumed to lead

patients into situations with a higher risk of becoming a victim of physical violence. However, to our knowledge, there have been no analyses on what type of symptoms may be specifically linked with a higher or lower risk of becoming a victim of violence. Further limitations within the existing research on victimization of patients with schizophrenia are that studies tend to focus on only one sample each so it may be difficult to generalise the findings beyond the specific characteristics of the sample and the given setting [1].

## Aim

Against this background, we studied what symptoms were associated with becoming a victim of physical violence in patients with schizophrenia and related disorders. Although the focus in this exploratory study was on symptoms associated with victimization, we also addressed what symptoms were associated with patients' reports of being accused of a crime themselves. This was done to obtain a more comprehensive picture of the associations of symptoms with risk that is related to violence and crime. We analysed data from two samples of involuntarily admitted patients with schizophrenia and related disorders. Conducting the analysis in two independent samples was intended to provide findings that are more reliable and less dependent on specific sample and setting characteristics than results obtained in only one sample. Both samples were assessed using the same methods.

## Methods

### Participants

The two independent samples were drawn from two related studies, which assessed psychiatric patients who had been involuntarily admitted to inpatient care. The *InvolE* study was conducted in England, whilst the *EUNOMIA* project studied patients across several European countries [20]. Both studies used a consistent methodology in the recruitment and assessment of patients. They recruited consecutive patients who were involuntarily admitted under the given mental health legislation and between 18 and 65 years of age. The *InvolE* study was conducted in 22 hospitals in England. Data for the *EUNOMIA* study was collected in between 1 and 5 hospitals in 12 countries. Yet, data on victimization was available in only seven countries including the United Kingdom. Some of the *EUNOMIA* patients in the UK had also been included in the *InvolE*, and consequently, the English patients were excluded from the *EUNOMIA* dataset for this analysis in order to have two independent samples. As a result, the European study sample analysed for the present paper included the patients from six countries, i.e. the Czech Republic, Germany, Lithuania, Poland, Slovakia and Sweden. Details of the rationale, methods and general findings of the two studies have been published elsewhere [21–24].

In the English sample, 49.6% of all eligible patients and 74.1% of all patients who were contacted and asked to participate were assessed. In the European sample these figures were 50.0% and 73.8%. From both datasets, we selected all patients with a diagnosis of schizophrenia or a related disorder (ICD-10 F20-F29) [25].

### Instruments

Socio-demographic (age, gender, employment status, housing situation, living situation, frequency of social contacts) and clinical variables (discharge diagnosis, past hospitalization) were obtained from medical records.

Victimization in the year prior to the interview was assessed with a question “in the last year have you been a victim of physical violence?”, which is part of the Manchester Short Assessment for

Quality of Life (MANSA) [26] and is answered with ‘yes’ or ‘no’. Being accused of a crime in the year prior to the interview was also assessed with a dichotomised question in the MANSA, i.e. “in the last year have you been accused of crime?”.

Symptoms were assessed on the Extended Version of the Brief Psychiatric Rating Scale [27]. For distinguishing between different types of symptoms, we used the four factor model suggested by Ventura and colleagues [28]. The model has the subscales depression (with the items anxiety, depression, suicidality, guilt), manic symptoms (motor hyperactivity, elevated mood, excitement, distractibility, grandiosity), negative symptoms (blunted affect, motor retardation, emotional withdrawal, self-neglect), and positive symptoms (bizarre behaviour, unusual thought content, disorientation, hallucinations, suspiciousness).

Additionally, reported misuse of non-prescribed drugs or alcohol shortly before admission was assessed in English patients only. Participants' statements on alcohol and substance misuse were dichotomised (yes vs. no). In this sample we also obtained data on the use of coercive measures (i.e. restraint, seclusion, forced medication) during the admission, i.e. after the arrival in the hospital. These details were obtained from medical records, and also dichotomised (at least one coercive measure vs. no coercive measure). Data on substance misuse and the use of coercive measures during the admission procedure was not available in the European sample.

### Procedures

Patients in both studies were involuntarily admitted and assessed within the first week of admission. Assessments were conducted by researchers who had all been trained in administering and rating the BPRS. In the study on the English sample the inter-rater reliability for the BPRS at the end of joint training sessions was 0.90 (Cohen's kappa), and in the European study it was 0.78 (intraclass correlation coefficient). All patients provided written informed consent, and the studies were approved by the relevant national ethics committees [21–24].

### Statistical analysis

Univariable logistic regression models were applied to assess the relationship between potential predictor variables and the two outcomes: ‘being a victim of physical violence’ and of ‘being accused of a crime’. Clinical variables included the scores of the BPRS subscales assessing depressive, manic, positive and negative symptoms. Data on previous hospitalization (yes vs. no) was also included. We considered the following socio-demographic variables: gender (male vs. female); age; employment status (unemployed vs. employed/student); housing situation (homeless vs. not homeless); frequency of social contact (one or more per month vs. less frequent contacts); and living situation (living alone vs. living with others). Variables significant at the 10% level were entered into multivariable logistic regression models. In a next step, any variables not significant at the 5% level were removed so that only variables significant at the 5% level remained in the final model. Additionally, we adjusted for country in the models fitted to the *EUNOMIA* sample. Crude and adjusted odds ratios are reported with 95% confidence intervals and p-values.

Since “being accused of a crime” and “being a victim” were expected to be correlated, we conducted sensitivity analyses to show whether the predictive value of independent variables was specific to each dependent variable. In these analyses, we included the variable “being accused of a crime” in the multivariable models predicting victimization, and the variable “being a victim of physical violence” in the models predicting being accused of a crime.

We conducted two further sensitivity analyses in the English sample by including additional variables in the multivariable logistic regression models. Firstly, the use of coercive measures during the admission was included in the model for predicting victimization, since patients may have referred to these experiences in their reports of having been a victim of physical violence in the last year. Secondly, we included substance misuse in the model predicting being accused of a crime as this has been suggested as an important predictor of violent behaviour in patients with psychosis.

All analyses were conducted in STATA, release 10.1 (StataCorp., College Station, TX, USA).

## Results

### The characteristics of the samples

In English sample 383 patients met the inclusion criteria for this paper. 269 (70.2%) received a diagnosis of schizophrenia (F 20-F 20.9) at discharge. Fifty three (13.8%) patients were diagnosed with acute transient psychotic disorder (F 23) and 43 (11.2%) with schizo-affective disorder (F 25).

In the European sample, 543 patients met the inclusion criteria: Czech Republic = 119; Germany = 65; Lithuania = 78; Poland = 107; Slovakia = 141; Sweden = 33. Two hundred eighty six (52.7%) were diagnosed with schizophrenia at discharge (F 20–F 20.9). A diagnosis of acute transient psychotic disorder (F 23) was given to 86 (15.8%) patients and a diagnosis of schizo-affective disorder (F 25) to 146 (26.9%).

In the English sample 130 patients (33.9%) had experienced at least one coercive measure since the arrival in the hospital, whilst 85/287 (29.6%) patients reported substance misuse prior to the admission.

The socio-demographic and clinical characteristics of the two samples are shown in Table 1.

### Victim of physical violence/accused of crime status

In the English sample 135/357 patients (37.8%) reported having been a victim of physical violence in the preceding year, while 92/360 (25.6%) stated they had been accused of a crime during the same period of time. Out of 351 responding to both questions, 88 (25.1%) were a victim only, 46 (13.1%) were accused of a crime only, while 45 (12.8%) reported belonging to both categories. 172 patients (49.0%) reported neither experience.

In the European sample 152/543 patients (28.0%) were victims of physical violence in the past year, while 63/542 (11.6%) were accused of crime. One hundred twenty one patients (22.3%) experienced physical victimization only and 32 (5.9%) were accused of crime only. Thirty one (5.7%) patients reported both experiences during past year and 358 (66.1%) stated neither.

Being a victim of physical violence and being accused of a crime were weakly associated (Pearson's  $r=0.141$ ,  $p=0.008$  in the English sample, and  $r=0.171$ ,  $p<0.001$  in the European one).

### Associations with being a victim of physical violence

Tables 2 and 3 present the univariable and multivariable associations of patients' clinical and socio-demographic characteristics with reports of having been a victim of physical violence in the last year.

In the English sample higher levels of manic symptoms were associated with greater odds of becoming a victim of physical violence in the univariable analysis (Odds Ratio (OR) 1.42; 95% CI 1.10–1.83;  $p=0.007$ ). This association remained significant in the multivariable analysis (OR 1.39; 95% CI 1.07–1.80;  $p=0.012$ ). With regard to socio-demographic characteristics,

**Table 1.** Clinical and socio-demographic characteristics of the patients in the English and European samples.

|                                           | English sample       |      | European sample |      |
|-------------------------------------------|----------------------|------|-----------------|------|
|                                           | N = 383              |      | N = 543         |      |
| <b>CLINICAL CHARACTERISTICS</b>           |                      |      |                 |      |
| <b>Diagnosis (N, %)</b>                   | N = 383              |      | N = 543         |      |
| F20                                       | 269                  | 70.2 | 286             | 52.7 |
| F21–29                                    | 114                  | 29.8 | 257             | 47.3 |
| <b>Symptoms on BPRS (mean, SD)</b>        | N <sup>a</sup> = 381 |      | N = 543         |      |
|                                           | N <sup>b</sup> = 379 |      |                 |      |
| Depressive symptoms <sup>a</sup>          | 2.37                 | 1.16 | 2.05            | 0.99 |
| Manic symptoms <sup>b</sup>               | 2.21                 | 0.89 | 1.97            | 0.82 |
| Negative symptoms <sup>a</sup>            | 1.93                 | 0.88 | 2.45            | 1.00 |
| Positive symptoms <sup>b</sup>            | 3.16                 | 1.21 | 2.79            | 1.02 |
| <b>Past hospitalisation</b>               | N = 375              |      | N = 535         |      |
| No                                        | 283                  | 75.5 | 119             | 22.2 |
| Yes                                       | 92                   | 24.5 | 416             | 77.8 |
| <b>Years since first hospitalization</b>  | N = 232              |      | N = 312         |      |
| Mean, SD                                  | 11.6                 | 8.7  | 14.5            | 10.4 |
| <b>Number of hospitalisations</b>         | N = 192              |      | N = 361         |      |
| Mean, SD                                  | 3.5                  | 7.0  | 1.7             | 3.8  |
| <b>SOCIO-DEMOGRAPHIC CHARACTERISTICS</b>  |                      |      |                 |      |
| <b>Age</b>                                | N = 380              |      | N = 543         |      |
| Mean, SD                                  | 35.9                 | 10.9 | 40.1            | 11.8 |
| <b>Gender (N, %)</b>                      | N = 383              |      | N = 543         |      |
| Male                                      | 275                  | 71.8 | 267             | 49.2 |
| Female                                    | 108                  | 28.2 | 276             | 50.8 |
| <b>Unemployed (N, %)</b>                  | N = 375              |      | N = 542         |      |
| No                                        | 68                   | 18.1 | 136             | 25.1 |
| Yes                                       | 307                  | 81.9 | 406             | 74.9 |
| <b>Homeless (N, %)</b>                    | N = 378              |      | N = 542         |      |
| No                                        | 347                  | 91.8 | 513             | 94.7 |
| Yes                                       | 31                   | 8.2  | 29              | 5.4  |
| <b>Social contacts (N, %)</b>             | N = 341              |      | N = 518         |      |
| Less than one per month                   | 128                  | 37.5 | 153             | 29.5 |
| One or more per month                     | 213                  | 62.5 | 365             | 70.5 |
| <b>Living situation (N, %)</b>            | N = 370              |      | N = 540         |      |
| With others                               | 75                   | 20.3 | 200             | 37.0 |
| Alone                                     | 295                  | 79.7 | 340             | 63.0 |
| <b>VICTIM/ACCUSED STATUS</b>              |                      |      |                 |      |
| <b>Victim of physical violence (N, %)</b> | N = 357              |      | N = 543         |      |
| No                                        | 222                  | 62.2 | 391             | 72.0 |
| Yes                                       | 135                  | 37.8 | 152             | 28.0 |
| <b>Accused of crime (N, %)</b>            | N = 360              |      | N = 542         |      |
| No                                        | 268                  | 74.4 | 479             | 88.4 |
| Yes                                       | 92                   | 25.6 | 63              | 11.6 |

doi:10.1371/journal.pone.0058142.t001

**Table 2.** Univariable and multivariable associations of symptoms and socio-demographic characteristics with being a victim of physical violence in the English sample.

|                                          | Victim of         |      | Not victim of     |      | Univariable Regressions |           |         | Multivariable Regression <sup>1</sup> |           |         |
|------------------------------------------|-------------------|------|-------------------|------|-------------------------|-----------|---------|---------------------------------------|-----------|---------|
|                                          | physical violence |      | physical violence |      | Crude OR                | 95% CI    | p-value | Adjusted OR                           | 95% CI    | p-value |
|                                          | N = 135           |      | N = 222           |      |                         |           |         |                                       |           |         |
| <b>CLINICAL CHARACTERISTICS</b>          |                   |      |                   |      |                         |           |         |                                       |           |         |
| <b>Symptoms on BPRS (mean, SD)</b>       |                   |      |                   |      |                         |           |         |                                       |           |         |
| Depressive symptoms                      | 2.42              | 1.12 | 2.33              | 1.17 | 1.07                    | 0.89–1.29 | 0.479   |                                       |           |         |
| Manic symptoms                           | 2.35              | 0.88 | 2.10              | 0.82 | 1.42                    | 1.10–1.83 | 0.007   | 1.39                                  | 1.07–1.80 | 0.012   |
| Negative symptoms                        | 1.90              | 0.87 | 1.90              | 0.86 | 0.99                    | 0.77–1.27 | 0.953   |                                       |           |         |
| Positive symptoms                        | 3.21              | 1.20 | 3.08              | 1.16 | 1.09                    | 0.91–1.31 | 0.334   |                                       |           |         |
| <b>Past hospitalization (N,%)</b>        |                   |      |                   |      |                         |           |         |                                       |           |         |
| No                                       | 103               | 39.3 | 159               | 60.7 | 1                       |           |         |                                       |           |         |
| Yes                                      | 29                | 32.2 | 61                | 67.8 | 1.36                    | 0.82–2.26 | 0.232   |                                       |           |         |
| <b>SOCIO-DEMOGRAPHIC CHARACTERISTICS</b> |                   |      |                   |      |                         |           |         |                                       |           |         |
| <b>Age (mean, SD)</b>                    |                   |      |                   |      |                         |           |         |                                       |           |         |
|                                          | 35.6              | 10.5 | 35.7              | 11.1 | 1.00                    | 0.98–1.02 | 0.944   |                                       |           |         |
| <b>Gender (N, %)</b>                     |                   |      |                   |      |                         |           |         |                                       |           |         |
| Male                                     | 98                | 37.7 | 162               | 62.3 | 0.98                    | 0.61–1.59 | 0.938   |                                       |           |         |
| Female                                   | 37                | 38.1 | 60                | 61.9 | 1                       |           |         |                                       |           |         |
| <b>Unemployed (N, %)</b>                 |                   |      |                   |      |                         |           |         |                                       |           |         |
| No                                       | 17                | 25.8 | 49                | 74.2 | 1                       |           |         |                                       |           |         |
| Yes                                      | 115               | 40.4 | 170               | 59.7 | 1.95                    | 1.07–3.55 | 0.029   | 1.88                                  | 1.02–3.44 | 0.042   |
| <b>Homeless (N, %)</b>                   |                   |      |                   |      |                         |           |         |                                       |           |         |
| No                                       | 119               | 36.6 | 206               | 63.4 | 1                       |           |         |                                       |           |         |
| Yes                                      | 15                | 50.0 | 15                | 50.0 | 1.73                    | 0.82–3.67 | 0.152   |                                       |           |         |
| <b>Social contacts (N, %)</b>            |                   |      |                   |      |                         |           |         |                                       |           |         |
| Less than one per month                  | 43                | 36.4 | 75                | 63.6 | 0.88                    | 0.55–1.41 | 0.595   |                                       |           |         |
| One or more per month                    | 82                | 39.4 | 126               | 60.6 | 1                       |           |         |                                       |           |         |
| <b>Living situation (N, %)</b>           |                   |      |                   |      |                         |           |         |                                       |           |         |
| With others                              | 26                | 35.6 | 47                | 64.4 | 1                       |           |         |                                       |           |         |
| Alone                                    | 105               | 38.0 | 171               | 62.0 | 1.11                    | 0.65–1.90 | 0.703   |                                       |           |         |

<sup>1</sup>Model fitted to 351 observations.  
doi:10.1371/journal.pone.0058142.t002

being unemployed (OR 1.95; 95% CI 1.07–3.55;  $p = 0.029$ ) was significantly associated with increased odds of becoming a victim of violence in both univariable and multivariable models (OR 1.88; 95% CI 1.02–3.44;  $p = 0.042$ ).

In univariable analyses carried out in the European sample higher levels of manic symptoms on the BPRS subscale (OR 1.48; 95% CI 1.18–1.85;  $p = 0.001$ ) were associated with greater odds of being a victim of physical violence. Higher levels of negative symptoms (OR 0.78; 95% CI 0.64–0.95;  $p = 0.013$ ) were associated with lower odds of victimization. Only the association with manic symptoms remained significant (OR 1.54; 95% CI 1.21–1.96;  $p < 0.001$ ) in the multivariable model. In univariable analysis, as compared to those with one or more social contacts per month, those with less frequent contacts had a significantly reduced odds of being a victim (OR 0.61; 95% CI 0.39–0.96;  $p = 0.033$ ). This association did not reach statistical significance in the multivariable model. No other socio-demographic variables were associated with being a victim of physical violence in univariable or multivariable analyses in the European sample.

### Associations with being accused of a crime

Associations of symptoms and patient characteristics with being accused of a crime are shown in Tables 4 and 5.

In the sample of English patients there were no statistically significant associations between BPRS symptoms and being accused of crime in either univariable or multivariable models. With respect to socio-demographic characteristics, male gender (OR 3.37; 95% CI 1.75–6.51;  $p < 0.001$ ), younger age (OR 0.97; 95% CI 0.95–0.99;  $p = 0.008$ ), being unemployed (OR 3.99; 95% CI 1.66–9.59;  $p = 0.002$ ), being homeless (OR 2.80; 95% CI 1.31–6.00;  $p = 0.008$ ), and living alone (OR 2.90; 95% CI 1.38–6.11;  $p = 0.005$ ) were associated with greater odds of being accused of a crime in univariable analyses. Only the associations with male gender (OR 2.92; 95% CI 1.44–5.89;  $p = 0.003$ ), younger age (OR 0.97; 95% CI 0.95–0.99;  $p = 0.015$ ), and being unemployed (OR 4.48; 95% CI 1.82–11.04;  $p = 0.001$ ) remained significant in multivariable models.

In the European sample higher levels of manic symptoms (OR 1.50; 95% CI 1.12–2.00;  $p = 0.006$ ) were associated with increased

**Table 3:** Univariable and multivariable associations of symptoms and socio-demographic characteristics with being a victim of physical violence in the European sample.

|                                          | Victim of         |      | Not victim           |      | Univariable regressions |           |         | Multivariable regression <sup>1,2</sup> |           |         |
|------------------------------------------|-------------------|------|----------------------|------|-------------------------|-----------|---------|-----------------------------------------|-----------|---------|
|                                          | physical violence |      | of physical violence |      | Crude OR                | 95% CI    | p-value | Adjusted OR                             | 95% CI    | p-value |
|                                          | N = 152           |      | N = 391              |      |                         |           |         |                                         |           |         |
| <b>CLINICAL CHARACTERISTICS</b>          |                   |      |                      |      |                         |           |         |                                         |           |         |
| <b>Symptoms on BPRS (mean, SD)</b>       |                   |      |                      |      |                         |           |         |                                         |           |         |
| Depressive symptoms                      | 1.98              | 0.98 | 2.08                 | 1.00 | 0.90                    | 0.74–1.09 | 0.295   |                                         |           |         |
| Manic symptoms                           | 2.16              | 0.92 | 1.89                 | 0.76 | 1.48                    | 1.18–1.85 | 0.001   | 1.54                                    | 1.21–1.96 | <0.001  |
| Negative symptoms                        | 2.28              | 0.98 | 2.52                 | 1.00 | 0.78                    | 0.64–0.95 | 0.013   |                                         |           |         |
| Positive symptoms                        | 2.87              | 1.02 | 2.76                 | 1.01 | 1.12                    | 0.93–1.34 | 0.229   |                                         |           |         |
| <b>Past hospitalization</b>              |                   |      |                      |      |                         |           |         |                                         |           |         |
| No                                       | 31                | 26.0 | 88                   | 74.0 | 1                       |           |         |                                         |           |         |
| Yes                                      | 117               | 28.1 | 299                  | 71.9 | 1.11                    | 0.70–1.76 | 0.656   |                                         |           |         |
| <b>SOCIO-DEMOGRAPHIC CHARACTERISTICS</b> |                   |      |                      |      |                         |           |         |                                         |           |         |
| <b>Age (mean,SD)</b>                     |                   |      |                      |      |                         |           |         |                                         |           |         |
|                                          | 40.4              | 12.6 | 39.9                 | 11.5 | 1.00                    | 0.99–1.02 | 0.670   |                                         |           |         |
| <b>Gender (N,%)</b>                      |                   |      |                      |      |                         |           |         |                                         |           |         |
| Male                                     | 70                | 26.2 | 197                  | 73.8 | 0.84                    | 0.58–1.22 | 0.365   |                                         |           |         |
| Female                                   | 82                | 29.7 | 194                  | 70.3 | 1                       |           |         |                                         |           |         |
| <b>Unemployed (N,%)</b>                  |                   |      |                      |      |                         |           |         |                                         |           |         |
| No                                       | 33                | 24.3 | 103                  | 75.7 | 1                       |           |         |                                         |           |         |
| Yes                                      | 119               | 29.3 | 287                  | 70.7 | 1.29                    | 0.83–2.02 | 0.258   |                                         |           |         |
| <b>Homeless (N,%)</b>                    |                   |      |                      |      |                         |           |         |                                         |           |         |
| No                                       | 143               | 27.9 | 370                  | 72.1 | 1                       |           |         |                                         |           |         |
| Yes                                      | 9                 | 31.0 | 20                   | 69.0 | 1.16                    | 0.52–2.62 | 0.713   |                                         |           |         |
| <b>Social Contacts (N,%)</b>             |                   |      |                      |      |                         |           |         |                                         |           |         |
| Less than one per month                  | 32                | 20.9 | 121                  | 79.1 | 0.61                    | 0.39–0.96 | 0.033   |                                         |           |         |
| One or more per month                    | 110               | 30.1 | 255                  | 69.9 | 1                       |           |         |                                         |           |         |
| <b>Living situation</b>                  |                   |      |                      |      |                         |           |         |                                         |           |         |
| With others                              | 49                | 24.5 | 151                  | 75.5 | 1                       |           |         |                                         |           |         |
| Alone                                    | 102               | 30.0 | 238                  | 70.0 | 1.32                    | 0.89–1.96 | 0.170   |                                         |           |         |

<sup>1</sup>Model fitted to 543 observations; <sup>2</sup>Controlling for country.  
doi:10.1371/journal.pone.0058142.t003

odds of being accused of a crime in univariable analyses. Higher levels of negative symptoms (OR 0.73; 95% CI 0.55–0.96;  $p = 0.027$ ) were associated with reduced odds of reporting the same experience. Only the association with manic symptoms remained significant in the multivariable analysis (OR 1.46; 95% CI 1.08–1.97;  $p = 0.015$ ). In this sample, male gender was positively associated with being accused of a crime in both univariable (OR 2.66; 95% CI 1.51–4.69;  $p = 0.001$ ) and multivariable analyses (OR 2.82; 95% CI 1.57–5.08;  $p = 0.001$ ). Younger age was associated with greater odds of being accused of a crime in the univariable analysis only (OR 0.98; 95% CI 0.95–1.00;  $p = 0.034$ ).

### Sensitivity analyses

When we included reports of having been accused of a crime in the multivariable model with being a victim of violence as a dependent variable, the associations with symptoms were virtually unchanged in both samples. The variables significant in the

multivariable models for being accused of a crime as a dependent variable retained the significance of their associations when recent victimization was included in the same models.

In the English sample we conducted further sensitivity analyses by including the experience of coercive measures during the admission as a variable in the prediction of victimization; and substance misuse prior to admission as a variable in the prediction of being accused of a crime.

The experience of coercive measures during admission was not significantly associated with victimization, and did not alter the associations with manic symptoms and unemployment in the multivariable models.

Self-reported substance misuse was associated with being accused of a crime in univariable (crude OR = 3.99, 95% CI 2.21 – 7.20,  $p < 0.001$ ) and multivariable analyses (adjusted OR 2.99; 95% CI 1.59 – 5.63;  $p = 0.001$ ). When this variable was included in the multivariable model, it did not alter the associations with socio-demographic variables.

**Table 4:** Univariable and multivariable associations of symptoms and socio-demographic characteristics with being accused of a crime in the English sample.

|                                          | Accused of crime |      | Not accused of crime |       | Univariable regressions |           |         | Multivariable regression <sup>1</sup> |            |         |
|------------------------------------------|------------------|------|----------------------|-------|-------------------------|-----------|---------|---------------------------------------|------------|---------|
|                                          | N = 92           |      | N = 268              |       | Crude OR                | 95% CI    | p-value | Adjusted OR                           | 95% CI     | p-value |
| <b>CLINICAL CHARACTERISTICS</b>          |                  |      |                      |       |                         |           |         |                                       |            |         |
| <b>Symptoms on BPRS (mean, SD)</b>       |                  |      |                      |       |                         |           |         |                                       |            |         |
| Depressive symptoms                      | 2.42             | 1.16 | 2.37                 | 1.17  | 1.03                    | 0.85–1.26 | 0.748   |                                       |            |         |
| Manic symptoms                           | 2.24             | 0.86 | 2.20                 | 0.90  | 1.05                    | 0.80–1.37 | 0.724   |                                       |            |         |
| Negative symptoms                        | 1.92             | 0.98 | 1.90                 | 0.84  | 1.02                    | 0.78–1.33 | 0.893   |                                       |            |         |
| Positive symptoms                        | 3.16             | 1.21 | 3.16                 | 1.19  | 1.00                    | 0.82–1.22 | 0.972   |                                       |            |         |
| <b>Past Hospitalization (N, %)</b>       |                  |      |                      |       |                         |           |         |                                       |            |         |
| No                                       | 64               | 26.4 | 23                   | 73.6  | 1                       |           |         |                                       |            |         |
| Yes                                      | 67               | 25.0 | 201                  | 75.0  | 0.93                    | 0.53–1.61 | 0.789   |                                       |            |         |
| <b>SOCIO-DEMOGRAPHIC CHARACTERISTICS</b> |                  |      |                      |       |                         |           |         |                                       |            |         |
| <b>Age (Mean, SD)</b>                    |                  |      |                      |       |                         |           |         |                                       |            |         |
|                                          | 33.2             | 10.0 | 36.8                 | 11.15 | 0.97                    | 0.95–0.99 | 0.008   | 0.97                                  | 0.95–0.99  | 0.015   |
| <b>Gender (N, %)</b>                     |                  |      |                      |       |                         |           |         |                                       |            |         |
| Male                                     | 80               | 31.0 | 178                  | 69.0  | 3.37                    | 1.75–6.51 | <0.001  | 2.92                                  | 1.44–5.89  | 0.003   |
| Female                                   | 12               | 11.8 | 90                   | 88.2  | 1                       |           |         | 1                                     |            |         |
| <b>Unemployed (N, %)</b>                 |                  |      |                      |       |                         |           |         |                                       |            |         |
| No                                       | 6                | 9.4  | 58                   | 90.6  | 1                       |           |         | 1                                     |            |         |
| Yes                                      | 85               | 29.2 | 206                  | 70.8  | 3.99                    | 1.66–9.59 | 0.002   | 4.48                                  | 1.82–11.04 | 0.001   |
| <b>Homeless (N, %)</b>                   |                  |      |                      |       |                         |           |         |                                       |            |         |
| No                                       | 78               | 23.8 | 250                  | 76.2  | 1                       |           |         |                                       |            |         |
| Yes                                      | 14               | 46.7 | 16                   | 53.3  | 2.80                    | 1.31–6.00 | 0.008   |                                       |            |         |
| <b>Social Contacts (N, %)</b>            |                  |      |                      |       |                         |           |         |                                       |            |         |
| Less than one per month                  | 37               | 29.8 | 87                   | 70.2  | 1.36                    | 0.83–2.25 | 0.226   |                                       |            |         |
| One or more per month                    | 49               | 23.8 | 157                  | 76.2  | 1                       |           |         |                                       |            |         |
| <b>Living situation (N, %)</b>           |                  |      |                      |       |                         |           |         |                                       |            |         |
| With others                              | 9                | 12.2 | 65                   | 87.8  | 1                       |           |         |                                       |            |         |
| Alone                                    | 80               | 28.7 | 199                  | 71.3  | 2.90                    | 1.38–6.11 | 0.005   |                                       |            |         |

<sup>1</sup>Model fitted to 352 observations.  
doi:10.1371/journal.pone.0058142.t004

## Discussion

### Main findings

In two large independent samples of involuntarily admitted patients with schizophrenia and related disorders, higher levels of manic symptoms were associated with increased odds of reporting having been a victim of physical violence in the previous year. These associations held true in multivariable analyses that were adjusted for the influence of other influential variables. In these multivariable models manic symptoms remained the only type of symptoms that was significantly linked with reports of experiencing physical violence in the previous year. Manic symptoms therefore indicate a higher risk of having been victimised in involuntary patients with schizophrenia and related disorders. Higher levels of such symptoms were also associated with reports of having been accused of a crime in one of the two samples.

### Strengths and limitations

To our knowledge, this is the first study investigating what types of symptoms are particularly associated with the risk of becoming a

victim of violence in patients with schizophrenia and related disorders. We analysed data from two independent samples to permit replication and reduce the risk of having findings that are context and setting specific. Although the samples showed significant differences in a number of characteristics, the findings on the association between manic symptoms and victimization were consistent. The sizes of both samples provided sufficient power for the statistical analysis to detect effects of a clinically relevant size. All participants were patients involuntarily admitted to hospital. Whilst it remains to be addressed in further studies to what extent the findings can be generalised to other groups of patients with schizophrenia, involuntarily admitted patients represent a group with a particularly high risk of being involved in violence (risk of physical harm to themselves or others is a common reason for involuntary admission) and the clinical challenge to predict risk in this group is especially relevant. The relatively high level of victimization, i.e. 37.8% in one sample and 28.0% in the other, should have increased the sensitivity of the analyses as compared to other samples (e.g. voluntary inpatients) with lower levels of victimization. Both samples were studied using

**Table 5:** Univariable and multivariable associations of symptoms and socio-demographic characteristics with being accused of a crime in the European sample.

|                                          | Accused of crime |      | Not accused of crime |      | Univariable regressions |           |         | Multivariable regression <sup>1,2</sup> |           |         |
|------------------------------------------|------------------|------|----------------------|------|-------------------------|-----------|---------|-----------------------------------------|-----------|---------|
|                                          | N = 63           |      | N = 479              |      | Crude OR                | 95% CI    | p-value | Adjusted OR                             | 95% CI    | p-value |
| <b>CLINICAL CHARACTERISTICS</b>          |                  |      |                      |      |                         |           |         |                                         |           |         |
| <b>Symptoms on BPRS (mean, SD)</b>       |                  |      |                      |      |                         |           |         |                                         |           |         |
| Depressive symptoms                      | 2.08             | 1.01 | 2.04                 | 0.99 | 1.04                    | 0.80–1.35 | 0.776   |                                         |           |         |
| Manic symptoms                           | 2.24             | 0.79 | 1.93                 | 0.82 | 1.50                    | 1.12–2.00 | 0.006   | 1.46                                    | 1.08–1.97 | 0.015   |
| Negative symptoms                        | 2.18             | 0.98 | 2.48                 | 0.99 | 0.73                    | 0.55–0.96 | 0.027   |                                         |           |         |
| Positive symptoms                        | 2.79             | 0.90 | 2.78                 | 1.03 | 1.01                    | 0.78–1.30 | 0.956   |                                         |           |         |
| <b>Past hospitalisation (N/%)</b>        |                  |      |                      |      |                         |           |         |                                         |           |         |
| No                                       | 10               | 8.5  | 108                  | 91.5 | 1                       |           |         |                                         |           |         |
| Yes                                      | 52               | 12.5 | 364                  | 87.5 | 1.54                    | 0.76–3.14 | 0.231   |                                         |           |         |
| <b>SOCIO-DEMOGRAPHIC CHARACTERISTICS</b> |                  |      |                      |      |                         |           |         |                                         |           |         |
| <b>Age (mean, SD)</b>                    |                  |      |                      |      |                         |           |         |                                         |           |         |
|                                          | 37.1             | 11.4 | 40.5                 | 11.8 | 0.98                    | 0.95–1.00 | 0.034   |                                         |           |         |
| <b>Gender (N/%)</b>                      |                  |      |                      |      |                         |           |         |                                         |           |         |
| Male                                     | 44               | 16.5 | 223                  | 83.5 | 2.66                    | 1.51–4.69 | 0.001   | 2.82                                    | 1.57–5.08 | 0.001   |
| Female                                   | 19               | 6.9  | 256                  | 93.1 | 1                       |           |         | 1                                       |           |         |
| <b>Unemployed (N/%)</b>                  |                  |      |                      |      |                         |           |         |                                         |           |         |
| No                                       | 12               | 8.8  | 124                  | 91.2 | 1                       |           |         |                                         |           |         |
| Yes                                      | 51               | 12.6 | 354                  | 87.4 | 1.49                    | 0.77–2.88 | 0.238   |                                         |           |         |
| <b>Homeless (N/%)</b>                    |                  |      |                      |      |                         |           |         |                                         |           |         |
| No                                       | 59               | 11.5 | 453                  | 88.5 | 1                       |           |         |                                         |           |         |
| Yes                                      | 4                | 13.8 | 25                   | 86.2 | 1.23                    | 0.41–3.65 | 0.711   |                                         |           |         |
| <b>Social Contacts (N/%)</b>             |                  |      |                      |      |                         |           |         |                                         |           |         |
| Less than one per month                  | 12               | 7.9  | 140                  | 92.1 | 0.55                    | 0.29–1.07 | 0.079   |                                         |           |         |
| One or more per month                    | 49               | 13.4 | 316                  | 86.6 | 1                       |           |         |                                         |           |         |
| <b>Living situation (N/%)</b>            |                  |      |                      |      |                         |           |         |                                         |           |         |
| With others                              | 20               | 10.0 | 180                  | 90.0 | 1                       |           |         |                                         |           |         |
| Alone                                    | 42               | 12.4 | 297                  | 87.6 | 1.27                    | 0.72–2.24 | 0.402   |                                         |           |         |

<sup>1</sup>Model fitted to 543 observations; <sup>2</sup>Controlling for country.  
doi:10.1371/journal.pone.0058142.t005

similar methods which helped to compare the findings, and psychopathological symptoms were assessed on a standardised scale by well-trained researchers who had achieved good inter-rater agreements [21–24]. A further strength of the study is that symptoms were assessed within the first week after admission when symptom levels were still high and probably reflected the type of symptoms patients had prior to their admission, rather than at a later stage when symptoms are supposed to have changed as a result of treatment. In the English sample we showed that the findings are not influenced by the experience of coercive measures, in the case of patients reporting victimization during the admission procedure, or by substance misuse as self-reported by patients, in the case of patients being accused of a crime.

The study has several limitations. Most importantly, victimization was assessed only through patient self-reports and these may be influenced by memory and reporting bias. People with manic symptoms may be more likely to report experiences of physical violence or interpret minor incidents as physical violence. Moreover, the experience was assessed using only one question. The analysis did therefore not distinguish between different types

of violence in terms of severity, duration, or the number and kind of people involved. The same limitations apply to the assessment of having been accused of a crime. The questions on victimization and being accused of a crime used different terms and are therefore not equivalent. This may have led to an underestimation of the association between being a victim and a perpetrator of violence. The association between current symptoms and victimization and being accused of a crime were established retrospectively rather than prospectively. This may have influenced the findings although one can only speculate as to whether the experience of physical violence might have caused later manic symptoms.

The two samples were selective as not all eligible patients who had been involuntarily admitted and who fulfilled the inclusion criteria within the study periods were interviewed. The recruitment of involuntarily admitted patients to research studies is challenging and both studies had included about 50% of the eligible patients which has been described as good for this type of research [29]. Any selection bias may have influenced the absolute levels of reported victimization, but should be less problematic for

establishing predictive associations, which are supposed to be more robust against selection bias. The sensitivity analyses considering coercive measures during admission and self-reported substance misuse as potential confounders was possible in only one of the two samples, and substance misuse was assessed using only one self-reported variable.

Finally, the association between manic symptoms and victimization could have been due to unobserved confounders, and potentially mediating factors, such as levels of outdoor activities, were not assessed.

### Comparison with literature

Involuntary inpatients are admitted because they may pose a risk to themselves or others. Thus, high rates of victimization and being accused of a crime may be expected in such populations. The levels of victimization in the samples studied here are in line with other findings in the literature [1,5]. The percentages of those being accused of a crime were also consistent with other research. Previous studies on the perpetration of violence reported rates ranging from 14.2% among voluntary inpatients one month before hospitalization to 50.4% in committed inpatients up to four months before hospitalization [2].

Whilst it has been previously suggested that higher symptom levels in general may be linked to victimization [30–35], this is the first study to provide evidence on the specific importance of manic symptoms. This association may have several explanations. Patients with higher levels of manic symptoms such as hyperactivity and elevated mood are more likely to be active, spend time outdoors and have social contacts. This can increase the likelihood of getting into situations that involve physical violence. Grandiosity, distractibility and excitement may impair patients' judgement in social situations, and lead to inappropriate assessments of the intention of others and their willingness to accept the wishes of the patient. Patients may misread the significance of other people's communication and take more risks which can increase the likelihood to engage in situations that escalate into violence. Manic symptoms can also reduce the self-control of patients so that they may trigger situations in which they become the victims of violence. Patients with manic symptoms can also be more irritable and dysphoric which can lead to aggression although one would assume that this would be linked to being accused of a crime as much as being a victim of violence, and we have found this association in one of the samples. These explanations are neither mutually exclusive nor exhaustive.

Several previous studies reported an association between symptom levels of persecutory delusions, suspiciousness, hallucinations, and grandiosity with a higher risk of committing a crime [13,15,16,36,37]. These associations however have not been consistent, and some studies report no significant associations

between symptoms and criminal behaviour. There may be a tendency for studies with lower prevalence of criminal behaviour to find associations between symptoms and criminal behaviour, whilst these cannot be shown in samples with higher risk levels. Accordingly, we identified an association between manic symptoms and being accused of a crime in the European sample, which had a lower percentage of patients who were reported to have been accused of a crime. It was not found in the English sample in which relatively more patients stated to have been accused of a crime.

With respect to socio-demographic characteristics as potential predictor variables of victimization, being unemployed was linked with a higher risk of victimisation in one of the two samples. This may be due to two factors. The regulated environment at most workplaces may limit the risk of becoming a victim of physical violence, and patients in employment are likely to have a generally better social functioning and therefore be able to avoid situations with a risk of violence.

Male gender was linked with a higher probability of being accused of a crime in multivariable analyses in both samples, while being unemployed and younger age in only one sample. All these associations are in line with what has been previously reported in the literature [14,38–42].

### Conclusions

The findings suggest that manic symptoms indicate a higher risk of becoming a victim of physical violence. Such symptoms should be considered in risk assessments and addressed in treatment plans for reducing the risk of victimization.

Future research should explore the mediating factors that put patients with more severe manic symptoms at a higher risk of victimization, and develop and test specific treatment strategies to reduce the risk for such patients.

### Acknowledgments

We are grateful to all the patients we interviewed and the staff at the participating hospitals. We thank all the researchers involved in data collection.

We also thank Prof Paolo Girardi, Prof Luigi Onnis and Prof Giuseppe Ducci, La Sapienza University of Rome, Italy, for their support.

### Author Contributions

Contributed to critical revision of drafts: SB CK AK LK PN JR TK. Approved the final draft: FF CK SB AK LK PN JR TK SP. Conceived and designed the experiments: AK LK PN JR TK SP. Performed the experiments: AK LK PN JR TK SP. Analyzed the data: FF SB CK SP. Wrote the paper: FF SP.

### References

- Choe JY, Teplin LA, Abram KM (2008) Perpetration of Violence, Violent Victimization, and Severe Mental Illness: Balancing Public Health Concerns. *Psychiatr Serv* 59: 153–164.
- Fazel S, Gulati G, Linsell L, Geddes JR, Grann M (2009) Schizophrenia and violence: systematic review and meta-analysis. *PLoS Medicine* 6(8): e1000120 DOI:10.1371/journal.pmed.1000120.
- Fazel S, Yu R (2011) Psychotic Disorders and Repeat Offending: Systematic Review and Meta-analysis. *Schizophr Bull* 37:800–810 DOI:10.1093/schbul/sbpl 135.
- Hodgins S, Alderton J, Cree A, Aboud A, Mak T (2007) Aggressive behaviour, victimization and crime among severely mentally ill patients requiring hospitalization. *Br J Psychiatry* 191: 343–350.
- Maniglio R (2009) Severe mental illness and criminal victimization: a systematic review. *Acta Psychiatr Scand* 119: 180–191.
- Naudts K, Hodgins S (2006) Neurobiological Correlates of Violent Behavior Among Persons With Schizophrenia. *Schizophr Bull* 32: 562–572.
- Teplin LA, McClelland GA, Abram KM, Weiner DA (2005) Crime Victimization in Adults with Severe Mental Illness, Comparison with the National Crime Victimization Survey. *Arch Gen Psychiatry* 62: 911–921.
- Walsh E, Buchanan A, Fahy T (2002) Violence and schizophrenia: examining the evidence. *Br J Psychiatry* 180: 490–495.
- Walsh E, Moran P, Scott C, McKenzie K, Burns T, et al. (2003) Prevalence of violent victimization in severe mental illness. *Br J Psychiatry* 183: 233–238.
- Taylor PJ (2008) Psychosis and violence: stories, fears, and reality. *Can J Psychiatry* 2008: 53: 647–59.
- Watson AC, Corrigan PW, Ottati V (2004) Police Officers' Attitudes toward and decisions about Persons with Mental Illness. *Psychiatr Serv* 55: 49–53.
- Nielsen OB, Malhi GS, McGorry PD, Large MM (2012) Overview of violence of self and others during the first episode of psychosis. *J Clin Psychiatry* 73:5 May 2012-12-30Doi:10.4088/JCP.11r07036



13. Swanson JW, Swartz MS, Van Dorn RA, Elbogen EB, Wagner HR, et al. (2006) A national study of violent behaviour in persons with schizophrenia. *Arch Gen Psychiatry* 63: 490–499.
14. Corrigan PW, Watson AC (2005) Findings from the National Co-morbidity Survey on the frequency of violent behavior in individuals with psychiatric disorders. *Psychiatr Res* 136: 153–162.
15. Junginger J (1996) Psychosis and violence: the case for a content analysis of psychotic experience. *Schizophr Bull* 22: 91–103.
16. Bartels SJ, Drake RE, Wallach MA, Freeman DH (1991) Characteristic hostility in schizophrenic outpatients. *Schizophr Bull* 17: 163–171.
17. Swartz MS, Swanson J, Hiday VA, Borum R, Wagner R, et al. (1998) Violence and Severe Mental Illness: The Effects of Substance Abuse and Non adherence to Medication. *Am J Psychiatry* 155: 226–228.
18. Silver E (2002) Mental disorder and violent victimization: the mediating role of involvement in conflicted social relationships. *Criminology* 40: 191–211.
19. Hiday VA, Swartz MS, Swanson JW, Borum R, Wagner HR (2002) Impact of outpatient commitment on victimization of people with severe mental illness. *Am J Psychiatry* 159: 1403–1411.
20. Kallert TW, Katsakou C, Adamowski T, Dembinskas A, Fiorillo A, et al. (2011) Coerced hospital admission and symptom change – A prospective observational multi-centre study *PloS One*, 6(11):e28191. doi:10.1371/journal.pone.0028191
21. Kallert TW, Glöckner M, Onchev G, Raboch J, Karastergiou A, et al. (2005) The EUNOMIA project on coercion in psychiatry: study design and preliminary data. *World Psychiatry* 4: 168–72.
22. Priebe S, Katsakou C, Amos T, Leese M, Morriss R, et al. (2009) Patients' views and readmissions 1 year after involuntary hospitalization (Involve). *Br J Psychiatry* 194: 49–54.
23. Priebe S, Katsakou C, Glöckner M, Dembinskas A, Fiorillo A, et al. (2010) Patients' views of involuntary hospital admission in 1 and 3 months: prospective study in 11 European Countries (EUNOMIA). *Br J Psychiatry* 196: 179–185.
24. Priebe S, Katsakou C, Yeeles K, Amos T, Morriss R, et al. (2011) Predictors of clinical and social outcomes following involuntary hospital admission: a prospective observational study. *Eur Arch Psychiatry Clin Neurosci* 261: 77–86.
25. World Health Organization (1992) The ICD–10 Classification of Mental and Behavioural Disorders. Geneva: WHO.
26. Priebe S, Huxley P, Knight S, Evans S (1999) Application and results of the Manchester Short Assessment of Quality of Life (MANSA). *Int J Soc Psychiatry* 45: 7–12.
27. Ventura J, Green MF, Shaner A (1993) Training and quality assurance with the Brief Psychiatric Rating Scale: 'The Drift Busters'. *Int J Method Psych* 3: 221–224.
28. Ventura J, Nuechterlein KH, Subotnik L, Gutkind D, Gilbert EA (2000) Symptom dimensions in recent-onset schizophrenia and mania: a principal components analysis of the 24-item Brief Psychiatric Rating Scale. *Psychiatr Res* 97: 129–135.
29. Katsakou C, Priebe S (2006) Outcomes of involuntary hospital admission – a review. *Acta Psychiatr Scand* 114: 232–241.
30. Arboleda-Florez J, Holley H, Crisanti A (1998) Understanding causal paths between mental illness and violence. *Soc Psychiatry Psychiatr Epidemiol* 33: S38–46.
31. Brekke JS, Prindle C, Bae SW, Long JD (2001) Risks for individuals with schizophrenia who are living in the community. *Psychiatr Serv* 52: 1358–1366.
32. Kruse M, Sørensen J, Brønnum-Hansen H, Helweg-Larsen K (2010) Identifying victims of violence using register-based data. *Scand J Public Health* 38: 611–617.
33. Lam JA, Rosenheck R (1998) The effect of victimization on clinical outcomes of homeless persons with serious mental illness. *Psychiatr Serv* 49: 678–683.
34. Sells DJ, Rowe M, Fisk D, Davidson L (2003) Violent victimization of persons with co-occurring psychiatric and substance use disorders. *Psychiatr Serv* 54: 1253–1257.
35. Vaughn MG, Fu Q, DeLisi M, Beaver KM, Perron BE, et al. (2010) Criminal victimization and co-morbid substance use and psychiatric disorders in the United States: results from the NESARC. *Ann Epidemiol* 20: 281–288.
36. Appelbaum MD, Paul S, Robbins PC (2000) Violence and Delusions: Data from the MacArthur Violence Risk Assessment Study. *Am J Psychiatry* 157: 566–572.
37. Link B, Stueve A (1994) Psychotic symptoms and the violent/illegal behavior of mental patients compared to community controls. In: *Violence and Mental Disorder: Developments in Risk Assessment*. Edited by Monahan J and Steadman H, University of Chicago Press: Chicago; pp 137–160.
38. Angermeyer MC, Cooper B, Link BG (1998) Mental disorder and violence: results of epidemiological studies in the era of de-institutionalization. *Soc Psychiatry Psychiatr Epidemiol* 33: s1–s6.
39. Arseneault I, Moffitt TE, Caspi A, Taylor PJ, Silva PA (2000) Mental Disorders and Violence in a Total Birth Cohort Results from the Dunedin Study. *Arch Gen Psychiatry* 57: 979–986.
40. Steadman HJ, Mulvey EP, Monahan J, Robbins PC, Appelbaum PS, et al. (1998) Violence by people discharged from acute psychiatric inpatient facilities and by others in the same neighborhoods. *Arch Gen Psychiatry* 55: 393–401.
41. Swanson JW, Swartz MS, Essock S, Osher FC, Wagner HR, et al. (2002) Social–Environmental Context of Violent Behaviour in Persons Treated for Severe Mental Illness. *Am J Public Health* 92: 1523–1531.
42. Torrey F, Stanley J, Monahan J, Steadman HJ, MacArthur Study Group (2008) The MacArthur Violence Risk Assessment Study Revisited: Two views ten years after its initial publication. *Psychiatr Serv* 59: 147–152
